# Supplementary material
Source: HighWire-hosted journal article supplement (https://dmd.aspetjournals.org/highwire/filestream/73266/field_highwire_adjunct_files/0/85605SupplementalData.pdf)

**TITLE:**

Prediction of human nonlinear pharmacokinetics of a new Bcl-2 inhibitor using PBPK modelling and interspecies extrapolation strategy

**AUTHORS:**

PIERRILLAS Philippe, HENIN Emilie, BALL Kathryn, OGIER Julien, AMIEL Magali, KRAUS-BERTHIER Laurence, CHENEL Marylore, BOUZOM François, TOD Michel

**JOURNAL NAME:**

Drug Metabolism and Disposition Journal

## SUPPLEMENTAL MATERIAL

**Supplemental Figure 1:** Plasma concentration–time profiles in mouse, rat and dog. Circles represent the observed concentrations, and the black line represents the PBPK predictions.

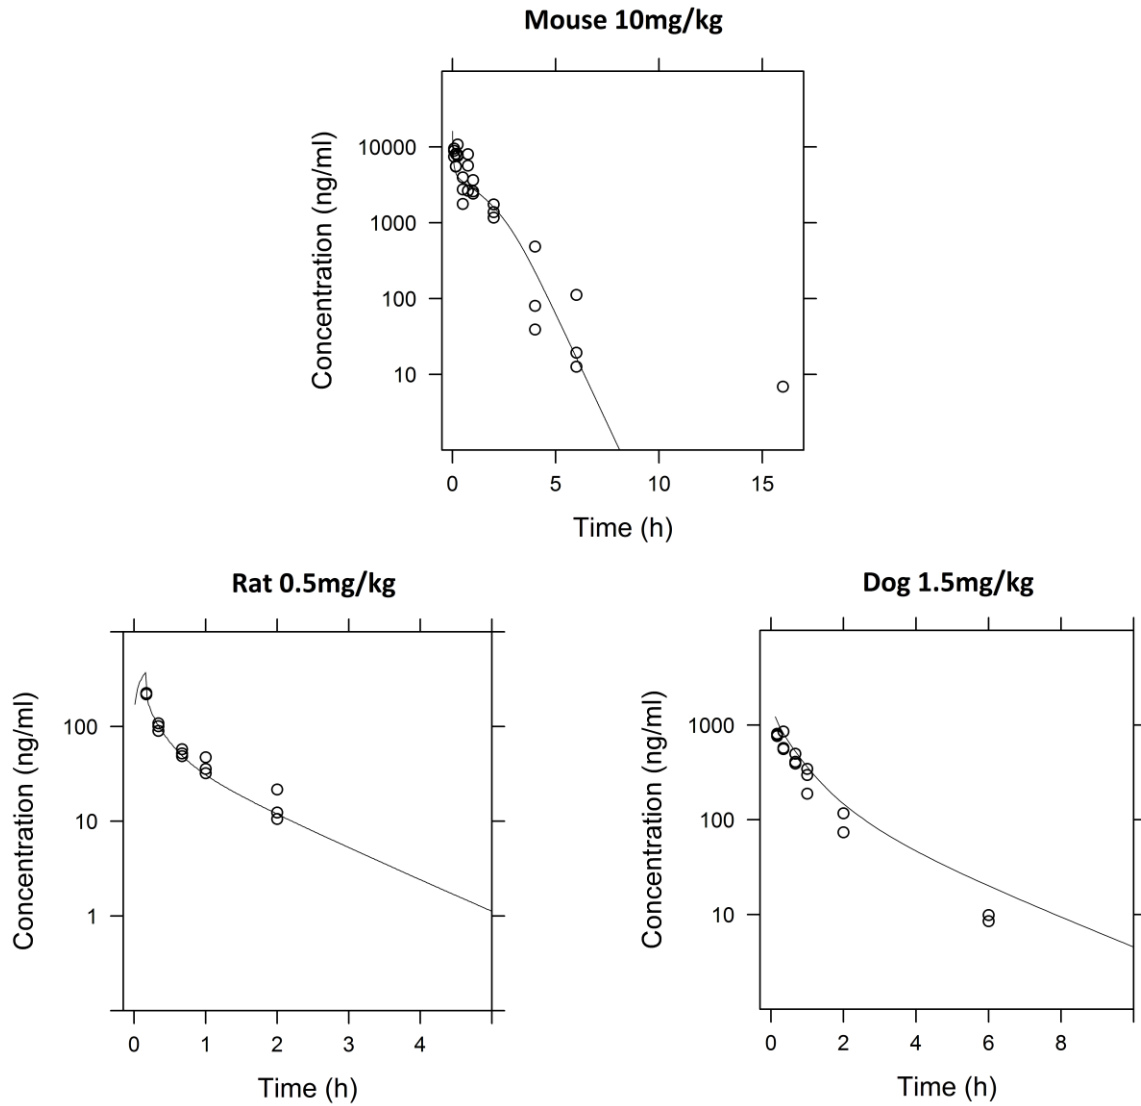

**Supplemental Figure 2:** Plasma concentration–time profiles in humans for all doses. Circles represent the observed concentrations and blue areas represent 90% prediction intervals.

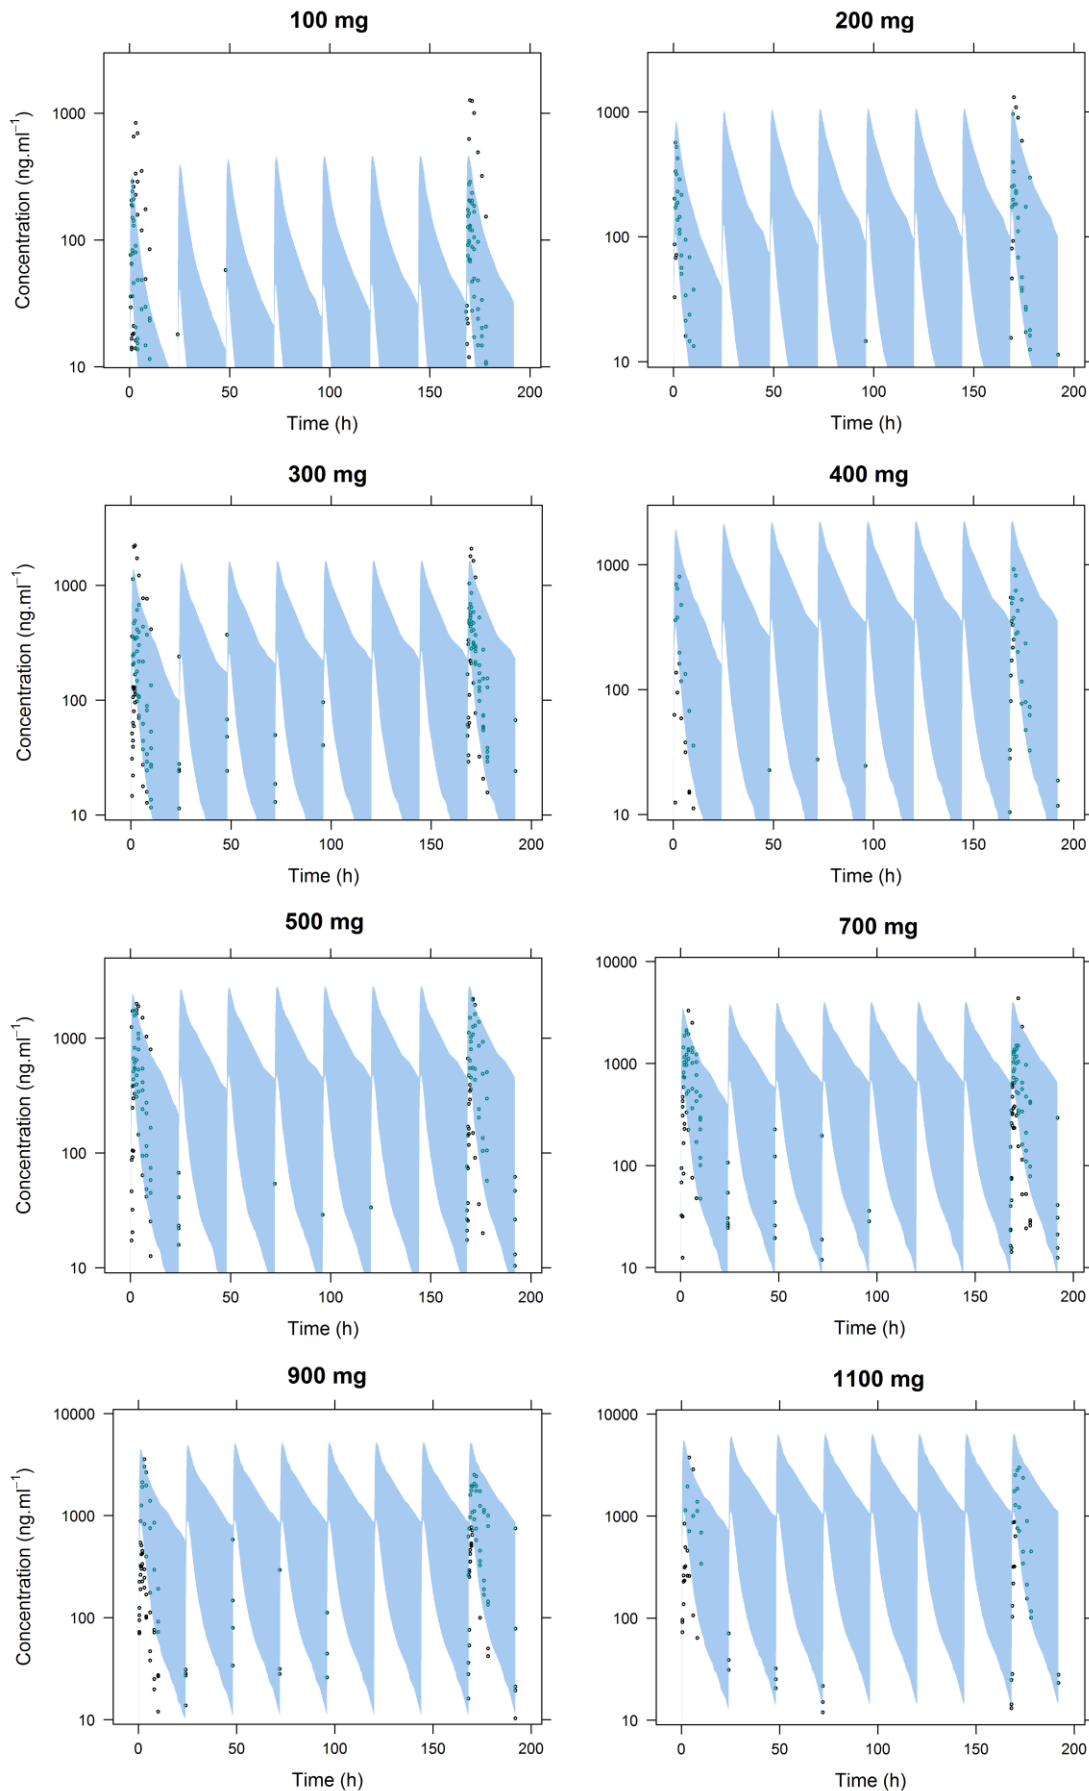

**Supplemental Figure 3:** Median AUC (upper panel) and median  $C_{max}$  (bottom panel) in plasma versus doses and day of treatment for the simulated PBPK model in humans.

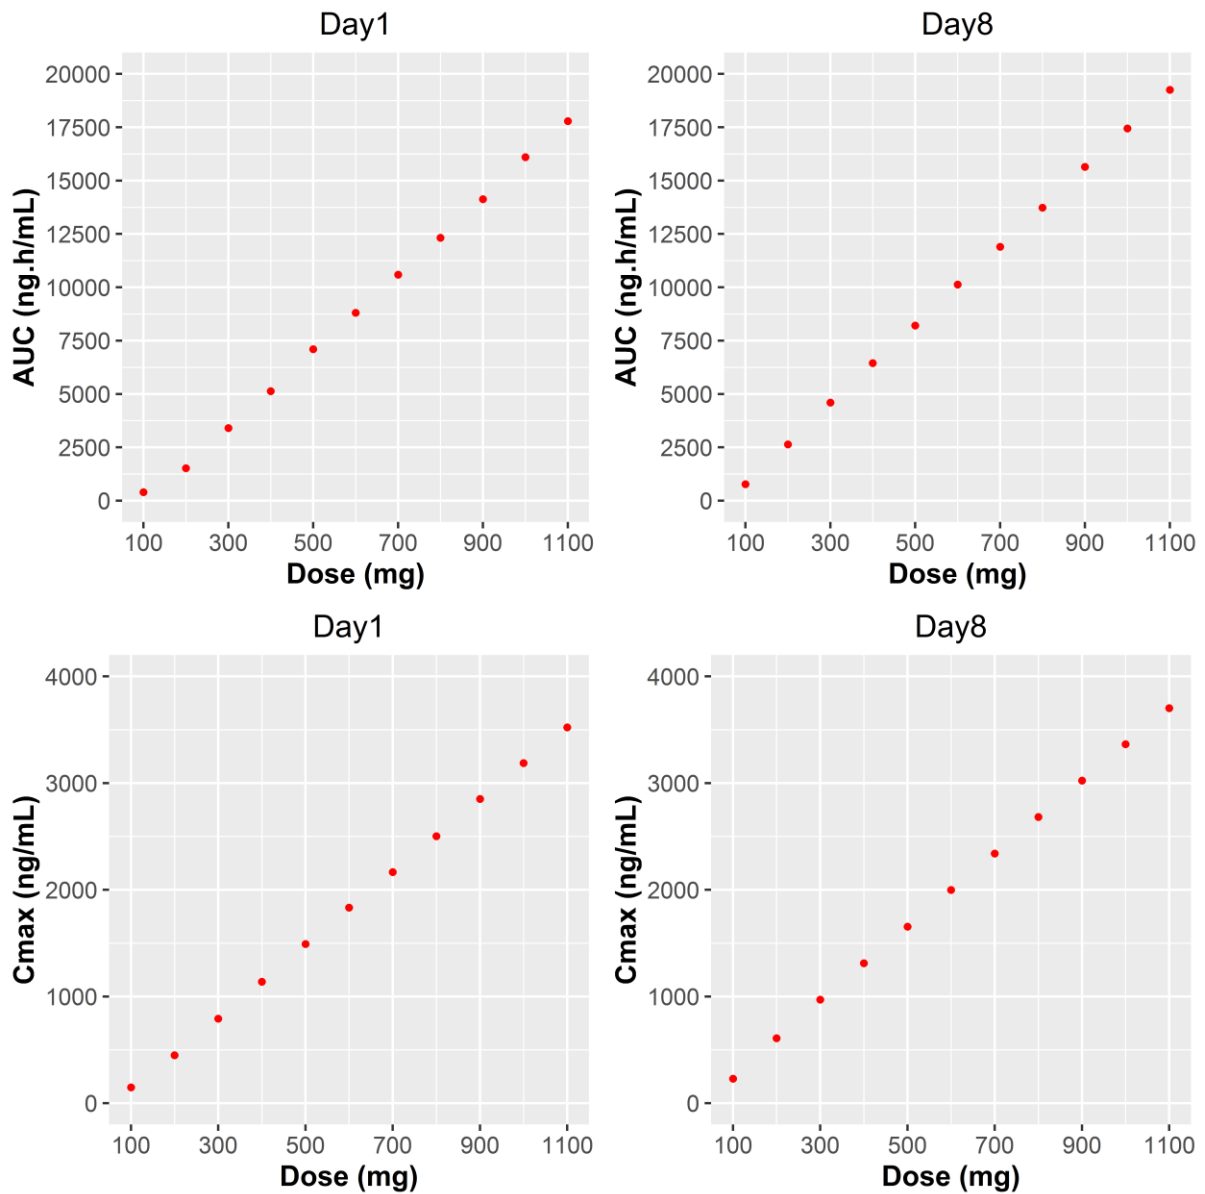

Supplement: 85605SupplementalData.pdf [file 85605SupplementalData.pdf]
